# Supplementary material for: An Electrochemical Amperometric Ethylene Sensor with Solid Polymer Electrolyte Based on Ionic Liquid
Source: MDPI journal article supplement (doi:10.3390/s21030711), 2021-01-21
Supplement: s1 [file s1]

## Supplementary materials

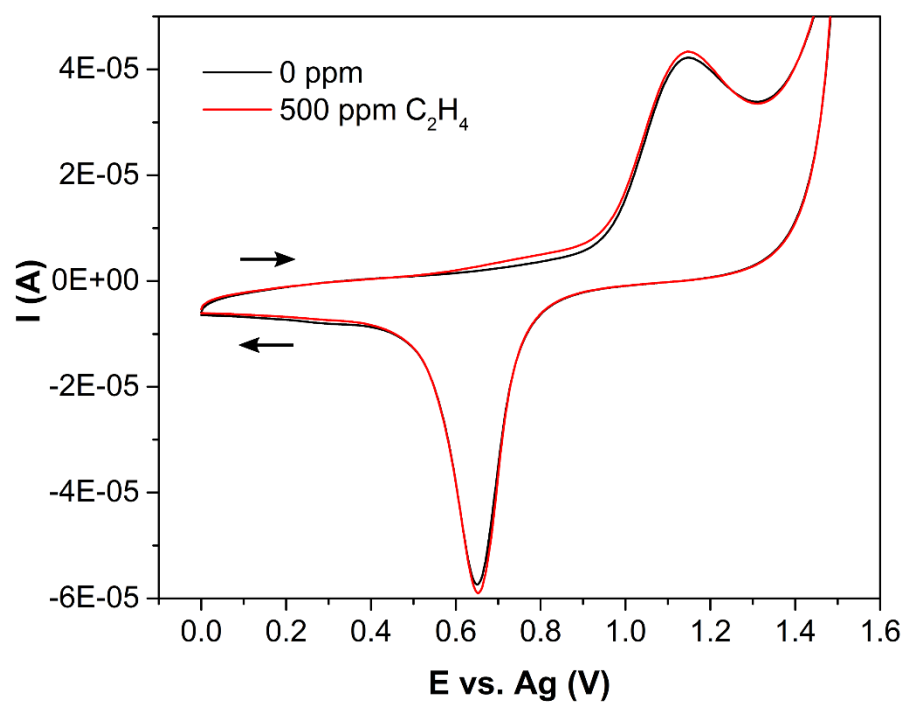

**Figure S1.** Current-voltage characteristics of the ionic liquid with/without gaseous ethylene (23 °C, 40 %RH, 101.325 kPa, 1 L/min, scan rate = 50 mV/s).

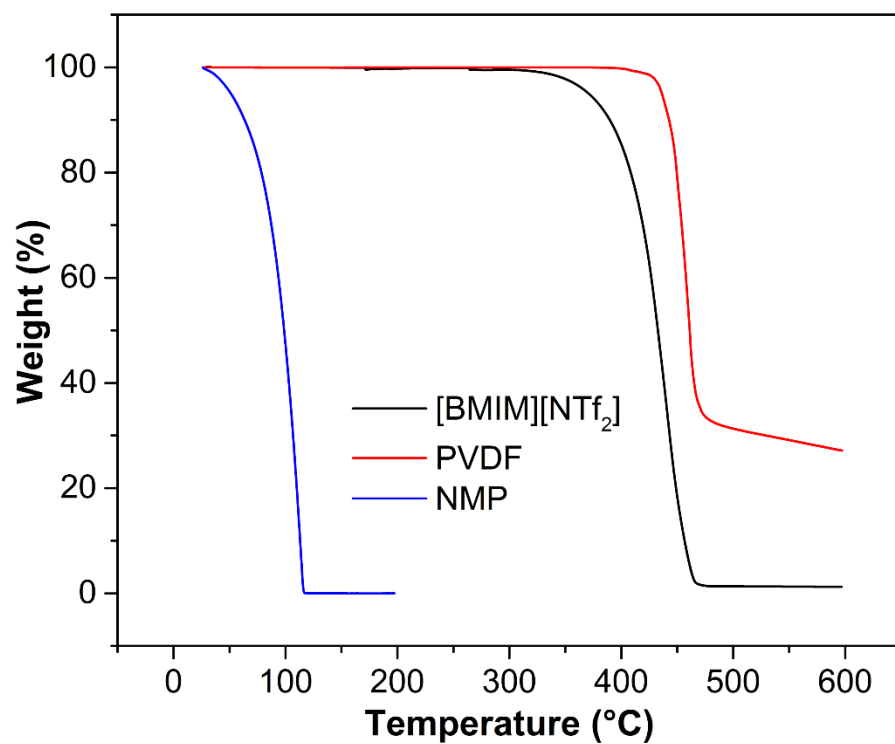

**Figure S2.** Thermogravimetric curves for components of the solid polymer electrolyte.
